# Supplementary figures and images for: Gold Nanoparticles Enhance the Tumor Growth-Suppressing Effects of Cetuximab and Radiotherapy in Head and Neck Cancer In Vitro and In Vivo
Source: MDPI journal article supplement (doi:10.3390/cancers15235697), 2023-12-03

## Supplementary Figure S1

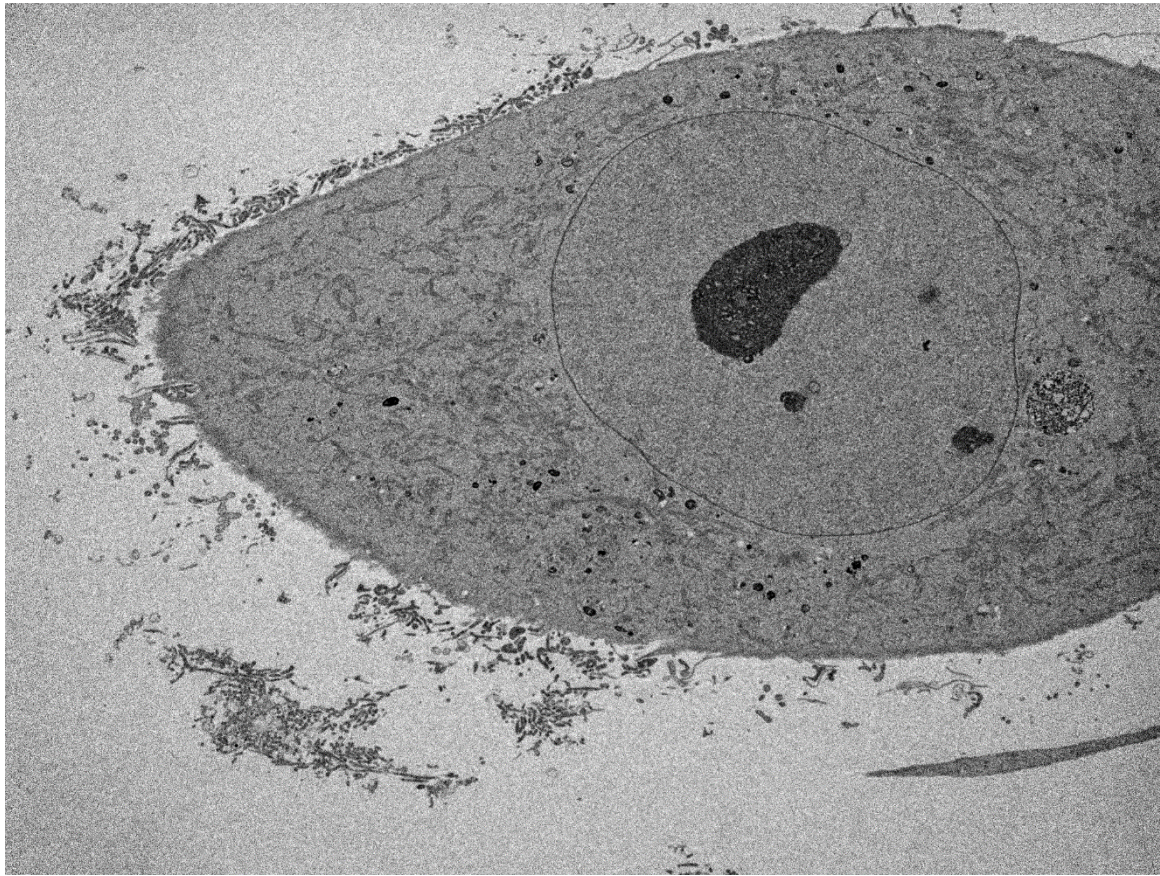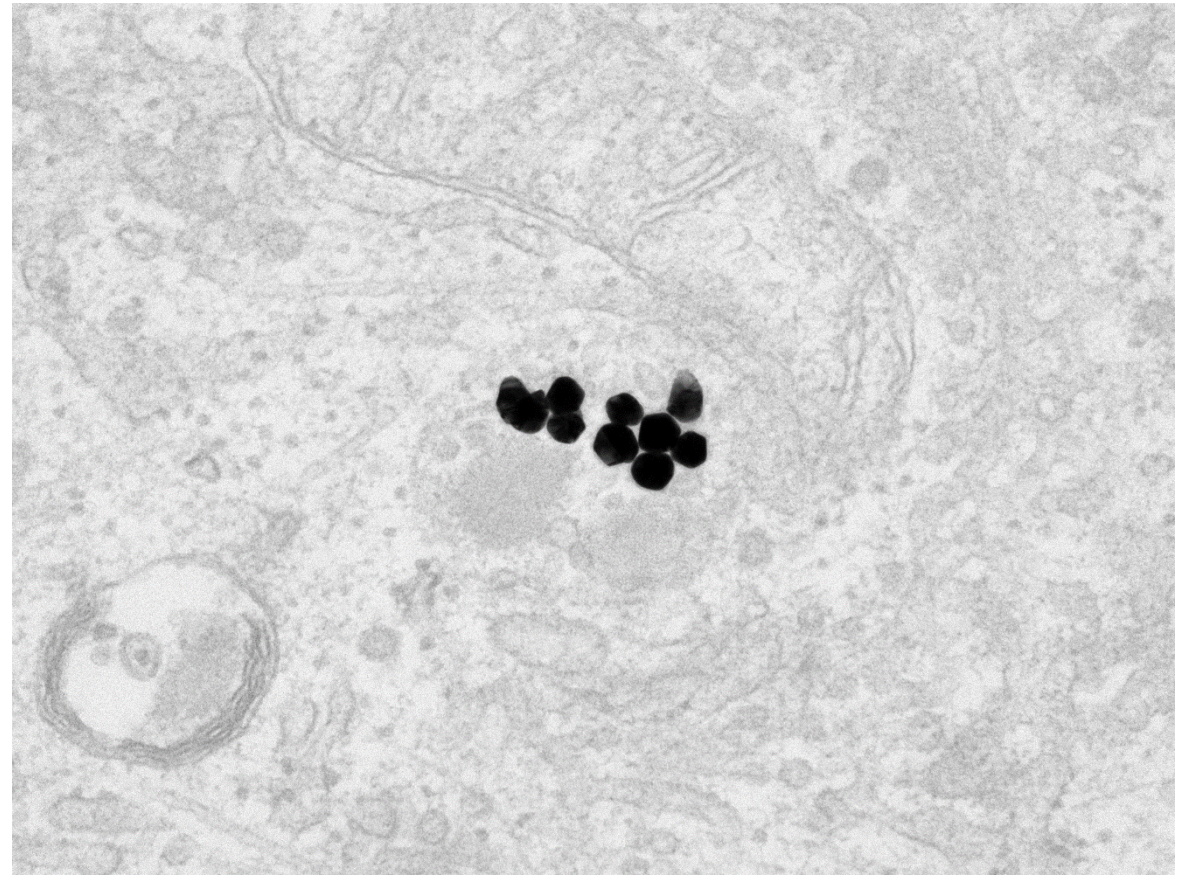

Representative TEM images. AuNP clusters consisted of several AuNPs.

Supplement: s1 [file s1]
